# Supplementary material for: Use and Appreciation of a Web-Based, Tailored Intervention (E-health4Uth) Combined With Counseling to Promote Adolescents’ Health in Preventive Youth Health Care: Survey and Log-File Analysis
Source: PubMed Central journal article supplement (PMC3906651; doi:10.2196/resprot.2855), 2014-01-06
Supplement: resprot_v3i1e61_app1.pdf [file resprot_v3i1e61_app1.pdf]

**Appendix 1: Topics of the E-health modules**

| <b>Behavior and well-being</b> | <b>Items</b>                                                                                |
|--------------------------------|---------------------------------------------------------------------------------------------|
| Alcohol consumption            | How often and how much the adolescent drinks alcohol (9 items)                              |
| Drugs use                      | How often the adolescents has used different types of drugs (17 items)                      |
| Smoking                        | How often the adolescent smokes (2 items)                                                   |
| Sexual behavior                | How often the adolescent uses condoms during sexual intercourse (2 items)                   |
| Bullying                       | How often the adolescent is bullied at school, somewhere else, or on the internet (3 items) |
| Mental health status           | Strength and Difficulties Questionnaire (SDQ) (25 items) with a total score range 0-40      |
| Suicidal thoughts              | If the adolescent has had suicidal thoughts last year (1 item)                              |
| Suicidal attempts              | If the adolescent made a suicidal attempt last year (1 item)                                |
| Unpleasant sexual experience   | If the adolescent has ever had an unpleasant sexual experience (1 item)                     |
